# Supplementary material for: Keratin 14-dependent disulfides regulate epidermal homeostasis and barrier function via 14-3-3σ and YAP1
Source: eLife. 2020 May 5;9:e53165. doi: 10.7554/eLife.53165 (PMC7250575; doi:10.7554/eLife.53165)
Supplement: Source data 1. [file elife-53165-data1.xlsx]

## Sheet: Figure 1
	Fig. 1G: Western blot quantitation
		wt			average	sem		373a			average	sem	t test
	ear	1	1	1	1	0		0.259073	0.64	0.37	0.423024	0.138537	0.036352
	paw	0.520819	0.634	0.758	0.637606	0.083885		0.784942	0.488	0.69	0.654314	0.107235	0.906456
	back	0.669683	0.347	0.217	0.411228	0.164809		0.57272	0.427	0.209	0.402907	0.129438	0.885579
	tail	2.1735	1.97	3.46	2.5345	0.571299		1.15697	1.12	2.409	1.56199	0.518851	0.00404734
	Fig. 1E: body weight
		wt	mut
		25.7	24.5
		25.9	27.07
		25.95	25.6
		27.1	24.8
		24.9	23.26
		29.5	30.13
		28.1	25.9
	average	26.7357	25.8943
	sem	0.653911	0.905096
	t value	0.154222

## Sheet: Figure 2
	Fig. 2B: epidermal thickness									Fig. 2C: TEWL									Fig. 2E: qPCR
											wt ctrl		wt ac		373a ctrl		373a ac		ac/ctrl	wt	average	sem		373a	averge	sem	t value
	ear					average	sem	t test			2.53		17.01		7.62		26.77		S100A1	2.4	2.83333	0.285774		7.8	6.13333	1.10529	0.0240084
	whole epidermis	mut	27.7	27.4	25.5	26.8667	0.843603	0.00161597			4.65		14.65		5.55		18.55			3.2				5.9
		wt	21.4	20.5	19.8	20.5667	0.567157				2.98		9.72		5.43		17.55			2.9				4.7
											3.64		11.32		7.64		15.05		S100A2	3.7	3.76667	0.920145		10.5	10.5667	1.20277	0.00532998
	living layers	mut	21.7	24.5	19.6	21.9333	1.73829	0.0452745			2.48		8.01		6.25		18.05			5.1				8.9
		wt	18.1	17.9	15.3	17.1	1.10454				1.42		9.16		9.64		19.2			2.5				12.3
										average	2.95		11.645		7.02167		19.195		S100A7	2.1	2.4	0.494975		5.6	5.66667	0.637704	0.00772769
	SC	mut	6	2.9	5.9	4.93333	1.24566	0.274238		sem	0.494174		1.56222		0.718072		1.77758			3.2				6.6
		wt	3.3	2.6	4.5	3.46667	0.679461			t test	0.000169897				3.91952e-05					1.9				4.8
																			S100A8	6.5	3.46667	1.91355		16	14.6	2.88791	0.0170176
										Fig. 2D: qPCR										2.6				17.8
										untreated	wt	average	sem	373a	averge	sem	t value			1.3				10
	tail					average	sem	t test		S100A8	0.90125	1.01563	0.0703111	6.02347	5.29738	0.765675	0.00241623		S100A9	13	13.1333	0.294392		38	31.3333	4.14327	0.00582144
	whole epidermis	mut	43.1	45.5	39.9	42.8333	1.98662	0.0171341			1.06411			5.81589						12.8				29
		wt	35.3	25.4	27.9	29.5333	3.64028				1.08152			4.0528						13.6				27
										A100A9	1.01406	1.01616	0.0089252	10.0063	9.88785	0.146769	2.00982e-07		S100A10	10.7	9.33333	1.1669		19.6	20.2333	2.2609	0.00631023
	living layers	mut	24.2	24.3	22.2	23.5667	0.837655	0.00445269			1.00472			9.64818						7.5				17.4
		wt	19.5	19.7	19.6	19.6	0.0707107				1.0297			10.009						9.8				23.7
										MMP9	1.18099	1.0697	0.0688723	4.03731	3.9687	0.0482386	1.88034e-06		IL-1a	1.8	1.86667	0.0816497		4.2	4.4	0.717635	0.012688
	SC	mut	18.9	21.2	17.7	19.2667	1.25764	0.043278			1.02811			3.96791						2				5.5
		wt	15.8	5.7	8.3	9.93333	3.70832				1			3.90088						1.8				3.5
										ptgs2	1.02811	0.964217	0.0618451	7.09433	7.48754	0.258538	7.30007e-06		IL-1b	0.4	1.3	0.636396		59.7	57.3	9.37897	0.0018763
											1			7.81728						1.3				43
											0.864537			7.55099						2.2				69.2
																			HMGB1	0.78	1.09333	0.219241		18.2	20.9	3.43001	0.00212545
	Fig. 2G: Tail CE shape																			1.4				18
	area	WT	mean	sem		373a	mean	sem	t value											1.1				26.5
		1.03583	1	0.0265419		0.808077	0.884119	0.0297188	0.0152647										DEFB3	2.1	1.43333	0.460072		4.8	4.06667	0.470815	0.00804762
		1.04356				0.918133														0.8				3.9
		0.958256				0.913082														1.4				3.5
		0.962359				0.897185													TSLP	2.3	1.56667	0.449073		5.2	4.06667	0.694022	0.0207629
																				1.2				3.5
	circumference		mean	sem		373a	mean	sem	t value											1.2				3.5
		1.02725	1	0.0209861		0.884311	0.919871	0.0166315	0.013544										HSPb1	0.6	1	0.324037		0.9	1.23333	0.216025	0.503762
		0.990829				0.909708														1.5				1.5
		0.952401				0.948914														0.9				1.3
		1.02952				0.936551													HSPa8	0.9	1.13333	0.227303		1.3	1.36667	0.216025	0.413679
																				1.5				1.7
	aspect ratio	WT	mean	sem		373a	mean	sem	t value											1				1.1
		0.978262	1	0.00847454		1.10069	1.11946	0.0124651	9.58223e-05										sprr2d	4.6	3.5	1.99123		2.6	2.03333	0.362859	0.424959
		1.00908				1.14261														0.3				1.9
		1.00396				1.10144														5.6				1.6
		1.00871				1.13308													sprr3	0.22	1.04	0.559821		3.8	4.7	0.717635	0.00790103
																				1.8				4.5
																				1.1				5.8

## Sheet: Figure 2 - fig. supp. 1
	Supp. Fig. 2B: Ear CE Shape
	area	WT	mean	sem		373a	mean	sem	t value
		0.988907	1	0.0232707		0.942251	0.927433	0.00749554	0.014016
		0.964287				0.911217
		0.988907				0.93146
		1.0579				0.924804
	circumference		mean	sem		373a	mean	sem	t value
		1.07716	1.025	0.0392476		0.932973	0.885562	0.0220093	0.0116687
		1.08555				0.895535
		0.944934				0.843344
		0.992355				0.870395
	aspect ratio	WT	mean	sem		373a	mean	sem	t value
		0.858948	1	0.102933		1.59518	1.35965	0.12928	0.0457151
		1.05816				1.12872
		0.856188				1.21312
		1.22671				1.50158

## Sheet: Figure 3
	Figure 3B: EdU incorporation
		WT							373a							t test
		basal	mean	sem	suprabasal	mean	sem		basal	mean	sem	suprabasla	mean	sem		basal	suprabasal
	2 h	11.9	10.2667	1.33479	0	0	0		16.5	16.4667	1.66183	1	0.333333	0.408248		0.0235341	0.373901
		8.2			0				14.1			0
		10.7			0				18.8			0
	1 d	15.7	14.3	1.25698	2.2	1.83333	0.248328		41.7	33.7	4.93153	4.1	3.33333	0.567157		0.00952743	0.0412582
		12.3			1.5				30.5			3.4
		14.9			1.8				28.9			2.5
	3 d	17.1	19.8333	1.90962	10.5	9.46667	1.26557		32.5	30.5333	1.20899	27.9	24	2.65801		0.00439976	0.00377476
		19.9			7.4				29.7			20.4
		22.5			10.5				29.4			23.7
	7 d	16.3	13.5333	2.0571	38.4	30.0667	5.70278		12.7	10.2	1.56365	95.5	82.4	8.0315		0.189268	0.00287854
		10.5			29.5				9.4			75.3
		13.8			22.3				8.5			76.4
	Fig. 3D: TUNEL													Fig. 3H: IHC quantitation
	wt	average	sem		373a	average	sem	t value							wt	mean	sem	373a	mean	sem	t value
	25	24.1575	3.74298		41.34	38.975	2.69215	0.00995818						K10	0.91	1.01	0.0833667	0.71	0.63	0.0494975	0.00864648
	31.82				42.42										0.98			0.6
	23.81				40										1.14			0.58
	16				32.14									flg	1.1	1.00333	0.0641613	0.37	0.38	0.0533854	0.000793045
															0.92			0.46
	Fig. 3F: p63 IHC quantitation														0.99			0.31
				Wildtype	Wildtype	Wildtype	mean		C373A	C373A	C373A	mean		lor	0.89	1.01667	0.0804156	0.66	0.523333	0.0872735	0.00702481
	Percentage of cells with nuclear p63 (%)			74.5455	67.9245	73.913	72.1277		56.9231	48.7805	47.6923	51.132			1.05			0.42
	Average distance of nuclear p63 cells to basal lamina (μm)			11.3019	10.7396	7.9296	9.99037		12.2662	13.57	11.4516	12.4292			1.11			0.49
	Fig. 3J: IHC quantitation
	claudin3	1.02	1	0.0187083	0.73	0.666667	0.0426224	0.000931765
		0.97			0.61
		1.01			0.66
	E-cad	1.1	1.01	0.0674537	1.07	1.05333	0.0402078	0.536202
		1.02			0.99
		0.91			1.1
	desmoplakin	0.91	0.996667	0.0679461	1.05	0.963333	0.0535413	0.66157
		0.98			0.91
		1.1			0.93

## Sheet: Figure 3 - fig. supp. 2
	Supp. Figure 3C: EM quantitation
		nuclear area											nuclear invaginations (%)
		basal nuclei				suprabasal nuclei							basal nuclei		suprabasal
		wt	relative	373a	relative	wt	relative	373a	relative				wt	373a	wt	373a
		2.4	1.00901	2.2	0.924925	1.6	0.672673	1.5	0.630631				17.2	24.5	7.5	12.4
		3.2	1.34535	1.5	0.630631	2.1	0.882883	1.4	0.588589				22.7	25.4	10.4	8.9
		1.8	0.756757	1.4	0.588589	1.1	0.462462	1.4	0.588589				19.3	16.7	12.7	20.5
		2.8	1.17718	1.5	0.630631	2.2	0.924925	2	0.840841				10.4	18.9	5.6	16.7
		2.3	0.966967	1.6	0.672673	3.5	1.47147	2.2	0.924925				13.5	30.2	4.9	12.5
		1.9	0.798799	2	0.840841	3.4	1.42943	2.7	1.13514				16	20.5	8.6	8.4
		1.6	0.672673	1.8	0.756757	2.7	1.13514	1.3	0.546547				23.8	19.9	5.7	6.7
		1.8	0.756757	1.7	0.714715	2.8	1.17718	1.7	0.714715				15.4	26.8	4.1	10.3
		2.9	1.21922	1.9	0.798799	3	1.26126	1.9	0.798799				16.9	29.4	9.2	12.1
		3	1.26126	2	0.840841	2.9	1.21922	1.2	0.504505				13.2	25.5	6.5	13.4
		3.1	1.3033	1.6	0.672673	1.8	0.756757	1.6	0.672673				11.7	36.7	4.3	7.5
		2.7	1.13514	1.4	0.588589	2.4	1.00901	1.8	0.756757				15.8	25.4	7.7	16.9
		1.9	0.798799	1.3	0.546547	3.3	1.38739	1.4	0.588589				20.5	28.8	10.2	12.7
		1.9	0.798799	1.5	0.630631	3.2	1.34535	1.7	0.714715				12.6	20.5	6.5	13.8
	average	2.37857		1.67143		2.57143		1.7				average	16.3571	24.9429	7.42143	12.3429
	relative area		1		0.702703		1.08108		0.714715			sem	1.12669	1.50447	0.730688	1.1161
	sem		0.0655121		0.0314975		0.085126		0.0470878			t value		6.03346e-05		0.000516167
	t value				0.000246636				0.000593692

## Sheet: Figure 4
	Fig. 4B: Western quantitation										Fig. 4E: qPCR
		wt		373a								wt	average	sem		373a	average	sem	t value
		1		0.464576							Cyr61	0.798426	1	0.285159		3.6181	3.12109	0.31544	0.00363383
												1.46432				2.98982
	Fig. 4G: Western quantitation											0.737253				2.75536
		wt	average	sem		373a	average	sem	t value		Zeb1	1.06175	1	0.0825168		3.94888	3.18751	0.492845	0.00584064
	YAP	0.95	1	0.03937		1.07	1.01333	0.0362859	0.77558			1.07285				3.03272
		0.99				1						0.865403				2.58093
		1.06				0.97					Ctgf	0.640646	1	0.227143		5.78613	4.31113	0.907032	0.0122816
	p-YAP	0.99	1.00333	0.0227303		0.96	0.993333	0.0248328	0.734418			1.10007				3.45659
		1.04				1.03						1.25928				3.69068
		0.98				0.99					Snail2	0.77801	1	0.353374		6.64773	4.85286	1.22596	0.0208635
												1.57228				3.18745
												0.649707				4.7234

## Sheet: Figure 4 - fig. supp. 1
	Supp. Fig. 4B: Western quantitation									Supp. Figure 4D: Western quantitation
	0 h	1.01	1	0.0533854							wt	average	sem		373a	average	sem	t value
		1.07								K10	0.988978	1	0.00962436		0.836272	0.763561	0.0950324	0.0387182
		0.92			t value						0.995809				0.845936
	15 h	0.97	1.09667	0.0778888	0.340739						1.01521				0.608474
		1.17								filaggrin	1.19552	1	0.127494		0.711747	0.591326	0.0746301	0.0275791
		1.15									0.964188				0.514885
	4 d	2.6	2.3	0.254951	0.0179842						0.84029				0.547345
		2.4
		1.9
	Supp. Fig. 4E: PLA
		wt	mean	sem	373a	mean	sem	t value
		0.91	1.03	0.0927362	0.37	0.396667	0.0216025	0.00123571
		1.17			0.43
		1.01			0.39

## Sheet: Figure 5
	Fig. 5B: Nuclear YAP IF quantitation									Fig. 5C: Luciferase quantitation
		wt	mean	sem	373a	mean	sem	t value			pRL-TK	pRL-TK, Cyr61-luc	pRL-TK, Cyr61-luc, K5, K14	pRL-TK, Cyr61-luc, K5, K14 CF
	no Ca2+	97.1	97.1	0.707107	99.1	97.7667	1.08012	0.561438		relative to prl-tk	1	8.52365	2.62806	5.55737
		96.1			98.1
		98.1			96.1					mean	0.3678	3.135	0.9666	2.044
	with Ca2+	29.4	26.4333	3.94356	89.3	94.1333	2.98524	7.42015e-05
		20			97.1					compiled raw F/R	0.582182	1.74683	3.49427	0.496525
		29.9			96						0	1.96502	0.698702	0.827541
											0.349296	4.658	0	0.993326
											0.248548	1.24772	0	3.47567
											1.74011	1.24772	1.74011	0.331047
											0.57993	3.49427	1.74011	2.99095
											0	1.74011	1.74011	0.49837
											0.869816	1.73936	0.500827	0
											0.500827	0	1.00165	2.99077
											0	2.31954	2.00331	0.332247
											1.00165	0.869816	0	1.49538
											0.249185	3.47967	0	2.00331
											1.49538	0	0.498506	0
											0.49837	4.00662	0.996741	3.00496
											0.331047	0.500827	0	1.00165
											0	1.00165	0.997012	4.00662
											0	1.00165	0.49837	2.99077
											0	0	0	0.996741
											0	1.49538	0	16.9489
											0.249185	4.98479	0.331923	1.49538
											1.49538	3.98805	0	0.996741
											0.49837	2.99104	0.998768	0.496525
											0.331047	2.99095	2.49746	0.827541
											0	4.98497	0.399556	0.993326
											0	0.99305	1.99754	3.47567
											0	0	2.99661	0.331047
											0	1.98665		1.19873
											0	5.95996		2.66376
											0.497859	1.49538		2.66376
											0	4.98479		1.66489
											0.1427	3.98805		1.16546
											0.12486	2.99104
											0.998973	2.99095
											0.12486	4.98497
											0	0.99305
											0.333002	0
												1.98665
												5.95996
												0.995876
												0
												1.99143
												4.39537
												13.9837
												8.98953
												2.74719
												15.4842
												6.9925

## Sheet: Figure 5 - fig. supp. 1
	Supp. Fig. 5B: IF Quantitation
			mean	sem
	GFP-K14WT	15.9	21.2667	4.40587
		19.8
		28.1
					t value
	CF	86.2	83.5333	1.65731	8.49315e-05
		82.6
		81.8
	C367A	83.4	82.3333	1.55778	8.91192e-05
		83.8
		79.8
	CFC367	27.5	23.4333	5.35226	0.721351
		14.7
		28.1

## Sheet: Figure 6
	Fig. 6B: IHC quantitation
		wt	mean	sem	373a	mean	sem	t value
	a-cat	1.2	1.09333	0.118603	1.55	1.73	0.173781	0.0207242
		0.9			2.01
		1.18			1.63
	Dsg1	1.17	1.09	0.110454	1.31	1.13333	0.120485	0.761683
		0.91			1.12
		1.19			0.97
	Lamin A/C	1.11	0.97	0.0860233	1.97	2.42	0.285394	0.00398426
		0.91			2.54
		0.89			2.75
	Figure 6F: Multinucleation
	WT	mean	sem		373a	mean	sem	t value
	2.8	2.66667	0.641613		14.3	14.7667	1.23558	0.00206539
	1.7				13.3
	3.5				16.7
