# Supplementary material for: Keratin 14-dependent disulfides regulate epidermal homeostasis and barrier function via 14-3-3σ and YAP1
Source: eLife. 2020 May 5;9:e53165. doi: 10.7554/eLife.53165 (PMC7250575; doi:10.7554/eLife.53165)
Supplement: Supplementary file 1. — List of all proteins with at least 35 spectral counts (cumulative over three biological replicates). Gene symbols are provided at left. WT1, WT2, WT3, WT4 and WT5 represent different regions of silver stained protein electrophoretic gels subjected to MS analysis (data not shown). Keratin protein entries dominate this screen, as expected, and are listed using blue lettering. 14-3-3 protein isoforms are listed using red lettering. The top non-keratin protein from this screen is 14-3-3sigma. [file elife-53165-supp1.xlsx]

## Sheet: MS WT only
Supplementary Table 1 (Guo et al.)
List of K14-interacting proteins identified in a proteomics screen conducted on wildtype mouse skin keratinocytes
Gene	Identified Proteins	Accession Number	MW	WT1	WT2	WT3	WT4	WT5	Total Counts
Krt5	keratin, type II cytoskeletal 5 [Mus musculus]	NP_081287.1	62 kDa	360	379	257	313	116	1425	NP 一081287.1
Krt10	keratin, type I cytoskeletal 10 [Mus musculus]	NP_034790.1 (+1)	57 kDa	181	487	324	307	96	1395	XP 一011247070.1 (+1)
Krt14	keratin, type I cytoskeletal 14 [Mus musculus]	NP 058654.1	53 kDa	228	287	157	384	244	1300	NP 058654.1
Krt17	keratin, type I cytoskeletal 17 [Mus musculus]	NP_034793.1	48 kDa	132	340	94	330	356	1252	NP 一034793.1
Krt6A	keratin, type II cytoskeletal 6A [Mus musculus]	NP_032502.3	59 kDa	307	284	120	325	172	1208	NP 一032502.3
Krt1	keratin, type II cytoskeletal 1 [Mus musculus]	NP 032499.2	66 kDa	73	409	297	248	77	1104	NP 032499.2
Krt42	keratin, type I cytoskeletal 42 [Mus musculus]	NP_997648.2	50 kDa	54	245	137	252	71	759	NP 一997648.2
Krt2	keratin, type II cytoskeletal 2 epidermal [Mus musculus]	NP_034798.2 (+1)	71 kDa	59	312	145	183	47	746	NP一034798.2 (+1)
Krt77	keratin, type II cytoskeletal 1b [Mus musculus]	NP 032499.2	61 kDa	82	246	189	156	0	673	NP 032499.2
Krt16	PREDICTED: keratin, type I cytoskeletal 16 isoform X1 [Mus musculus]	NP_001300887.1(+1)	52 kDa	77	154	86	200	76	593	NP_001300887.1(+1)
Krt19	keratin, type I cytoskeletal 19 [Mus musculus]	NP_032497.1	45 kDa			27		377	404	NP 一032497.1
SFN	14-3-3 protein sigma [Mus musculus]	NP_061224.2	28 kDa	0	0	254	133	0	387	NP 一061224.2
RPS3	40S ribosomal protein S3 (RPS3) [Mus musculus]	NP_058655.3	27 kDa	0	232	112	0	0	344	#N/A
Krt15	keratin, type I cytoskeletal 15 [Mus musculus]	NP_032495.2	49 kDa	0	0	0	194	146	340	NP 一032495.2
RACK1	Receptor of activated protein C kinase 1 (RACK 1) [Mus musculus]	NP_032169.1	35 kDa	0	273	44	4	0	321	#N/A
DSP	desmoplakin [Mus musculus]	NP_076331.2 (+1)	333 kDa	28	185		104		317	NP一076331.2 (+1)
HspB1	heat shock protein beta-1 (Hsp27) [Mus musculus]	NP_038588.2	23 kDa	0	0		284		284	#N/A
serpinB6	serpin B6 isoform a [Mus musculus]	NP_001157589.1 (+7)	45 kDa			0		258	258	NP 一001157589.1 (+7)
ACTB	actin, cytoplasmic 1 [Mus musculus]	NP_031419.1(+6)	42 kDa			4		253	257	NP_031419.1(+6)
Krt75	keratin, type II cytoskeletal 75 [Mus musculus]	NP_579935.1	60 kDa	0	66		186		252	NP 一579935.1
YWHAZ	14-3-3 protein zeta/delta isoform 1 [Mus musculus]	NP_001240734.1 (+4)	28 kDa	0	0	100	149	0	249	NP_001240734.1 (+4)
YWHAG	14-3-3 protein gamma [Mus musculus]	NP_061359.2	28 kDa	0	0	133	96	0	229	NP 一061359.2
Esd	S-formylglutathione hydrolase isoform 2 [Mus musculus]	NP 001272352.1 (+2)	31 kDa	0	224		0		224	NP 001272352.1 (+2)
LMO7	PREDICTED: LIM domain only protein 7 isoform X12 [Mus musculus]	XP_006519251.1 (+8)	157 kDa	212	0		0		212	XP 一006519251.1 (+8)
GSTO1	glutathione S-transferase omega-1 [Mus musculus]	NP_034492.1	27 kDa	0	8	162	23	0	193	NP 一034492.1
Krt79	keratin, type II cytoskeletal 79 [Mus musculus]	NP_666175.1	58 kDa	57	103		30		190	NP 一666175.1
CAPZB	F-actin-capping protein subunit beta isoform c [Mus musculus]	NP_001258334.1 (+1)	29 kDa	0	183		0		183	NP 001258334.1 (+1)
JUP	junction plakoglobin [Mus musculus]	NP_034723.1 (+2)	82 kDa	22	91		69		182	NP 一034723.1 (+2)
PRMT1	protein arginine N-methyltransferase 1 isoform 2 [Mus musculus]	NP_001239405.1 (+3)	41 kDa			0		179	179	#N/A
HSD17B12	estradiol 17-beta-dehydrogenase 12 [Mus musculus]	NP_062631.1	35 kDa	0	0	132	44	0	176	#N/A
SLC25A3	phosphate carrier protein, mitochondrial precursor [Mus musculus]	NP_598429.1(+1)	40 kDa	0	90	69	0	0	159	NP_598429.1(+1)
Krt13	keratin, type I cytoskeletal 13 [Mus musculus]	NP_034792.1	48 kDa			154		0	154	NP 一034792.1
EIF6	eukaryotic translation initiation factor 6 [Mus musculus]	NP_034709.1	27 kDa	0	0		152		152	NP_034709.1
DSg1b	desmoglein-1-beta precursor [Mus musculus]	NP_859010.1 (+1)	114 kDa	48	46	21	33	0	148	#N/A
YWHAB	14-3-3 protein beta/alpha [Mus musculus]	NP_061223.2 (+1)	28 kDa	0	0	59	86	0	145	NP一061223.2 (+1)
YWHAQ	14-3-3 protein theta [Mus musculus]	NP_035869.1	28 kDa	0	0	64	72	0	136	NP 一035869.1
SLC25A5	ADP/ATP translocase 2 [Mus musculus]	NP 031477.1	33 kDa	0	0	65	67	0	132	NP 031477.1
RAN	GTP-binding nuclear protein Ran [Mus musculus]	NP_033417.1 (+2)	24 kDa	0	8		122		130	NP 一033417.1 (+2)
GAPDH	PREDICTED: glyceraldehyde-3-phosphate dehydrogenase-like isoform 2 [Mus musculus]	NP_001276655.1 (+3)	36 kDa	12	91		25		128	#N/A
CA13	carbonic anhydrase 13 [Mus musculus]	NP_078771.1	30 kDa	0	0	20	95	0	115	NP 一078771.1
Krt78	keratin Kb40 [Mus musculus]	NP_997652.4 (+2)	112 kDa	20	55		39		114	NP一997652.4 (+2)
serpinB2	plasminogen activator inhibitor 2, macrophage [Mus musculus]	NP_001167641.1 (+2)	46 kDa			0		112	112	#N/A
RPS27A	ubiquitin-40S ribosomal protein S27a precursor [Mus musculus]	NP_001029037.1 (+8)	18 kDa	23	18	17	40	13	111	NP 一001029037.1 (+8)
YWHAH	14-3-3 protein eta [Mus musculus]	NP_035868.1	28 kDa	0	0		103		103	NP 一035868.1
YWHAE	14-3-3 protein epsilon [Mus musculus]	NP_033562.3	29 kDa			102		0	102	NP 一033562.3
PHB	prohibitin [Mus musculus]	NP_032857.1	30 kDa	0	0	81	21	0	102	NP 一032857.1
RAB25	ras-related protein Rab-25 [Mus musculus]	NP_058595.2	23 kDa	0	0		100		100	NP_058595.2
RAB5C	ras-related protein Rab-5C [Mus musculus]	NP_077776.2	23 kDa	0	0		99		99	NP 一077776.2
ALDOA	fructose-bisphosphate aldolase A isoform 1 precursor [Mus musculus]	NP_001170778.1 (+10)	45 kDa	30	4	0	0	65	99	NP 一001170778.1 (+10)
DHX9	ATP-dependent RNA helicase A [Mus musculus]	XP 011246220.1 (+1)	150 kDa	95	0		0		95	XP 011246220.1 (+1)
GET4	Golgi to ER traffic protein 4 homolog isoform 1 [Mus musculus]	NP_080545.2 (+1)	37 kDa	0	92		0		92	#N/A
TBCB	tubulin-folding cofactor B [Mus musculus]	NP_079824.2	27 kDa	0	69	21	0	0	90	NP 一079824.2
RAB5A	ras-related protein Rab-5A [Mus musculus]	NP_080163.1	24 kDa	0	0		89		89	NP 一080163.1
ARPC2	actin-related protein 2/3 complex subunit 2 [Mus musculus]	NP_083987.1(+1)	34 kDa	0	88		0		88	NP_083987.1(+1)
RAB5B	ras-related protein Rab-5B [Mus musculus]	NP_803130.1(+1)	24 kDa	0	0		85		85	NP_803130.1(+1)
FAM83H	protein FAM83H [Mus musculus]	NP_001161725.1 (+3)	131 kDa	83	0		0		83	NP 一001161725.1 (+3)
TIM44	mitochondrial import inner membrane translocase subunit TIM44 [Mus musculus]	NP_035722.2	51 kDa			0		81	81	#N/A
RAB21	ras-related protein Rab-21 [Mus musculus]	NP_077774.1 (+3)	24 kDa	0	0		79		79	NP 一077774.1 (+3)
CAPG	macrophage-capping protein [Mus musculus]	NP_001035999.1 (+4)	39 kDa			0		72	72	NP_001035999.1 (+4)
PKP1	plakophilin-1 [Mus musculus]	NP_001300630.1 (+1)	81 kDa	0	47		23		70	NP 一001300630.1 (+1)
ANXA2	annexin A2 [Mus musculus]	NP_031611.1 (+1)	39 kDa	0	39	11	19	0	69	NP_031611.1(+1)
CYB5R3	NADH-cytochrome b5 reductase 3 [Mus musculus]	NP_084063.1 (+2)	34 kDa	0	66		0		66	NP 一084063.1 (+2)
SLC25A4	ADP/ATP translocase 1 [Mus musculus]	NP 031476.3 (+1)	33 kDa	0	0		66		66	NP 031476.3 (+1)
serpinB5	serpin B5 [Mus musculus]	NP_033283.1	42 kDa			0		65	65	NP 一033283.1
PCBP1	poly(rC)-binding protein 1 [Mus musculus]	NP 035995.1	37 kDa			0		65	65	NP 035995.1
WDR61	WD repeat-containing protein 61 isoform a [Mus musculus]	NP_001020546.1 (+1)	34 kDa	0	64		0		64	NP 一001020546.1 (+1)
PHB2	prohibitin-2 [Mus musculus]	NP_031557.2	33 kDa	0	62		0		62	#N/A
C1QBP	complement component 1 Q subcomponent-binding protein, mitochondrial [Mus musculus]	NP_031599.2	31 kDa			62		0	62	#N/A
BUB3	mitotic checkpoint protein BUB3 [Mus musculus]	NP_001304279.1 (+1)	37 kDa			0		61	61	NP 一001304279.1 (+1)
BLVRA	biliverdin reductase A precursor [Mus musculus]	NP_080954.4 (+3)	34 kDa	0	55		0		55	NP一080954.4 (+3)
HNRNPA3	heterogeneous nuclear ribonucleoprotein A3 isoform c [Mus musculus]	NP_444493.1 (+3)	37 kDa	0	29	0	0	26	55	#N/A
ECE-2	endothelin-converting enzyme 2 isoform d [Mus musculus]	NP_647454.2	29 kDa	0	54		0		54	#N/A
RAB35	ras-related protein Rab-35 [Mus musculus]	NP_937806.1	23 kDa	0	0		53		53	NP 一937806.1
IARS	isoleucine--tRNA ligase, cytoplasmic [Mus musculus]	NP_742012.2 (+1)	144 kDa	52	0		0		52	#N/A
Kb14	type II keratin Kb14 [Mus musculus]	NP_001003670.1	60 kDa	0	0		52		52	#N/A
TGM1	protein-glutamine gamma-glutamyltransferase K [Mus musculus]	NP 001155186.1 (+4)	90 kDa	12	31		8		51	NP 001155186.1 (+4)
MTAP	S-methyl-5'-thioadenosine phosphorylase [Mus musculus]	NP_077753.1	31 kDa	0	0	35	15	0	50	NP 一077753.1
HNRNPA1	heterogeneous nuclear ribonucleoprotein A1 isoform a [Mus musculus]	NP_001034218.1 (+1)	34 kDa	0	47		0		47	#N/A
IMPA2	inositol monophosphatase 2 [Mus musculus]	NP_444491.1	32 kDa	0	27	20	0	0	47	NP 一444491.1
DPM1	dolichol-phosphate mannosyltransferase subunit 1 [Mus musculus]	NP_001297013.1 (+1)	29 kDa	0	0		46		46	#N/A
MLF2	myeloid leukemia factor 2 [Mus musculus]	NP_663360.1(+1)	28 kDa	0	29	17	0	0	46	NP 一663360.1(+1)
UCHL3	ubiquitin carboxyl-terminal hydrolase isozyme L3 [Mus musculus]	NP_057932.2	26 kDa	0	0		45		45	NP_057932.2
SBDS	ribosome maturation protein SBDS [Mus musculus]	NP_075737.1	29 kDa	0	0	26	19	0	45	NP 一075737.1
DNAJB6	dnaJ homolog subfamily B member 6 isoform a [Mus musculus]	NP_001033029.1 (+4)	27 kDa	0	0		43		43	NP 一001033029.1 (+4)
SRPRB	signal recognition particle receptor subunit beta [Mus musculus]	NP_033301.1	30 kDa			42		0	42	#N/A
MAGT1	magnesium transporter protein 1 [Mus musculus]	NP_001177338.1(+1)	42 kDa	0	0	18	24	0	42	NP_001177338.1(+1)
HSD17B7	3-keto-steroid reductase [Mus musculus]	NP_034606.3 (+1)	35 kDa	0	40		0		40	NP一034606.3 (+1)
RAB10	ras-related protein Rab-10 [Mus musculus]	NP_057885.1	23 kDa	0	0		39		39	NP 一057885.1
RAB8A	ras-related protein Rab-8A [Mus musculus]	NP_075615.2	24 kDa	0	0		38		38	NP 一075615.2
TPI1	triosephosphate isomerase [Mus musculus]	NP_033441.2	32 kDa	0	0		38		38	NP 一033441.2
ARHGDIB	rho GDP-dissociation inhibitor 2 isoform 1 [Mus musculus]	NP_001288230.1 (+4)	23 kDa	0	0		37		37	NP_001288230.1 (+4)
NUDT5	ADP-sugar pyrophosphatase [Mus musculus]	NP_058614.1 (+4)	29 kDa	0	37		0		37	NP 一058614.1 (+4)
RAB6A	ras-related protein Rab-6A isoform 1 [Mus musculus]	NP_001157135.1 (+1)	24 kDa	0	0		37		37	NP_001157135.1(+1)
ANXA1	annexin A5 [Mus musculus]	NP_033803.1	36 kDa	0	36		0		36	NP 033803.1
RPS4	40S ribosomal protein S4, X isoform [Mus musculus]	NP_033120.1(+1)	30 kDa	0	0		36		36	NP_033120.1(+1)
SRM	spermidine synthase [Mus musculus]	NP 033298.1	34 kDa	0	36		0		36	NP 033298.1
RDH11	retinol dehydrogenase 11 precursor [Mus musculus]	NP_067532.2	35 kDa			36		0	36	NP_067532.2
HAL	histidine ammonia-lyase [Mus musculus]	NP_034531.1	72 kDa	0	35		0		35	NP 一034531.1
RRAS2	ras-related protein R-Ras2 precursor [Mus musculus]	NP_080122.2	23 kDa	0	0		35		35	NP 一080122.2
										#VALUE!
										#VALUE!
										#VALUE!
										#VALUE!
										#VALUE!
										#VALUE!
										#VALUE!
										#VALUE!
										#VALUE!
										#VALUE!
										#VALUE!
										#VALUE!
										#VALUE!
										#VALUE!
										#VALUE!
										#VALUE!
										#VALUE!
										#VALUE!
										#VALUE!
										#VALUE!
										#VALUE!
										#VALUE!
										#VALUE!
										#VALUE!
										#VALUE!
										#VALUE!
										#VALUE!
										#VALUE!
										#VALUE!
										#VALUE!
										#VALUE!
										#VALUE!
										#VALUE!
										#VALUE!
										#VALUE!
										#VALUE!
										#VALUE!
										#VALUE!
										#VALUE!
										#VALUE!
										#VALUE!
										#VALUE!
										#VALUE!
										#VALUE!
										#VALUE!
										#VALUE!
										#VALUE!
										#VALUE!
										#VALUE!
										#VALUE!
										#VALUE!
										#VALUE!
										#VALUE!
										#VALUE!
										#VALUE!
										#VALUE!
										#VALUE!
										#VALUE!
										#VALUE!
										#VALUE!
										#VALUE!
										#VALUE!
										#VALUE!
										#VALUE!
										#VALUE!
										#VALUE!

## Sheet: Sheet1
trvDsinoaen Drecursor rSus scrofal	NP 001156363.1
keratin, type II cytoskeletal 5 [Mus musculus]	NP 一081287.1
PREDICTED: keratin, type I cytoskeletal 10 isoform XI...	XP 一011247070.1 (+1)
keratin, type I cytoskeletal 14 isoform 1 [Mus muscul...	NP 058654.1
keratin, type II cytoskeletal 6A [Mus musculus]	NP 一032502.3
keratin, type II cytoskeletal 2 epidermal [Mus muscul...	NP一034798.2 (+1)
keratin, type II cytoskeletal 1 [Mus musculus]	NP 032499.2
keratin, type I cytoskeletal 17 [Mus musculus]	NP 一034793.1
keratin, type II cytoskeletal lb [Mus musculus]	NP_001003667.1(+1)
desmoolakin rMus musculusl	NP 076331.2 (+1)
heat shock protein beta-1 [Mus musculus]	NP 一038588.2
receptor of activated protein C kinase 1 [Mus musculu...	NP 一032169.1
40S ribosomal Drotein S3 rMus musculusl	NP 036182.1
junction plakoglobin [Mus musculus]	NP 一034723.1 (+2)
keratin, type I cytoskeletal 16 isoform 1 [Mus muscul...	NP_001300887.1(+1)
S-formylglutathione hydrolase isoform 1 [Mus muscul...	NP 001272352.1 (+2)
keratin, type II cytoskeletal 2 oral [Mus musculus]	NP 一001028349.1
PREDICTED: LIM domain only protein 7 isoform X12 [M...	XP 一006519251.1 (+8)
serum albumin precursor [Bos taurus]	gi |30794280|
uncharacterized protein LOC239673 [Mus musculus]	NP 一808385.2
F-actin-capping protein subunit beta isoform c [Mus m...	NP 001258334.1 (+1)
glyceraldehyde-3-phosphate dehydrogenase isoform...	NP 一001276655.1 (+3)
14-3-3 protein sigma [Mus musculus]	NP 一061224.2
eukaryotic translation initiation factor 6 [Mus muscul...	NP_034709.1
keratin, type I cytoskeletal 42 [Mus musculus]	NP 一997648.2
desmoglein-l-beta preproprotein [Mus musculus]	NP_859010.1(+1)
keratin, type II cytoskeletal 79 [Mus musculus]	NP 一666175.1
keratin Kb40 [Mus musculus]	NP一997652.4 (+2)
GTP-binding nuclear protein Ran [Mus musculus]	NP 一033417.1 (+2)
actin, cytoplasmic 1 [Mus musculus]	NP_031419.1(+6)
RING finger protein 214 isoform 2 [Mus musculus]	NP 001297768.1 (+7)
keratin, type II cytoskeletal 75 [Mus musculus]	NP 一579935.1
14-3-3 protein zeta/delta isoform 1 [Mus musculus]	NP_001240734.1 (+4)
protease, serine, 1 precursor [Mus musculus]	NP 444473.1
phosphate carrier protein, mitochondrial precursor [M...	NP_598429.1(+1)
ras-related protein Rab-25 [Mus musculus]	NP_058595.2
keratin, type II cuticular Hb2 [Mus musculus]	NP 444479.2
ubiquitin-40S ribosomal protein S27a precursor [Mus ...	NP 一001029037.1 (+8)
PREDICTED: ATP-dependent RNA helicase A isoform XI...	XP 011246220.1 (+1)
carbonic anhydrase 13 [Mus musculus]	NP 一078771.1
actin-related protein 2/3 complex subunit 2 [Mus mus...	NP_083987.1(+1)
Golai to ER traffic protein 4 homoloa isoform 1 TMus m...	NP 080545.2 (+1)
plakophilin-1 [Mus musculus]	NP 一001300630.1 (+1)
protein FAM83H [Mus musculus]	NP 一001161725.1 (+3)
actin, alpha skeletal muscle [Mus musculus]	NP 一001258970.1 (+4)
annexin A2 [Mus musculus]	NP_031611.1(+1)
tubulin-folding cofactor B [Mus musculus]	NP 一079824.2
ras-related protein Rab-21 [Mus musculus]	NP 一077774.1 (+3)
ADP/ATP translocase 1 [Mus musculus]	NP 031476.3 (+1)
ras-related protein Rab-5A [Mus musculus]	NP 一080163.1
ras-related protein Rab-5B [Mus musculus]	NP_803130.1(+1)
Drohibitin-2 rMus musculusl	NP 031557.2
keratin, type II cytoskeletal 73 [Mus musculus]	NP 一997650.1
WD repeat-containing protein 61 isoform a [Mus musc...	NP 一001020546.1 (+1)
protein-glutamine gamma-glutamyltransferase K [Mu...	NP 001155186.1 (+4)
NADH-cytochrome b5 reductase 3 [Mus musculus]	NP 一084063.1 (+2)
eukaryotic translation elongation factor 1 alpha lysine…	NP_079738.2
trypsin 10 precursor [Mus musculus]	NP 001034085.1
keratin, type I cytoskeletal 15 [Mus musculus]	NP 一032495.2
biliverdin reductase A precursor [Mus musculus]	NP一080954.4 (+3)
isoleucine—tRNA ligase, cytoplasmic [Mus musculus]	NP一742012.2 (+1)
ras-related protein Rab-5C isoform 1 [Mus musculus]	NP 一077776.2
NP 一080264.1-DECOY	NP 一080264.1-DECOY
14-3-3 protein eta [Mus musculus]	NP 一035868.1
very-long-chain 3-oxoacyl-CoA reductase [Mus muse...	NP 一062631.1
heterogeneous nuclear ribonucleoprotein A1 isoform ...	NP 001034218.1 (+1)
dnaJ homolog subfamily B member 6 isoform a [Mus ...	NP 一001033029.1 (+4)
ubiquitin carboxyl-terminal hydrolase isozyme L3 [Mu...	NP_057932.2
dolicho卜phosphate mannosyltransferase subunit 1 iso."	NP 001297013.1 (+1)
3-keto-steroid reductase [Mus musculus]	NP一034606.3 (+1)
keratin, type II cytoskeletal 80 [Mus musculus]	NP一083046.2 (+1)
40S ribosomal protein S4, X isoform [Mus musculus]	NP_033120.1(+1)
peroxiredoxin-2 [Mus musculus]	NP 一001304314.1 (+1)
triosephosphate isomerase [Mus musculus]	NP 一033441.2
annexin A5 [Mus musculus]	NP 033803.1
14-3-3 protein gamma [Mus musculus]	NP 一061359.2
ras-related protein Rab-8A [Mus musculus]	NP 一075615.2
Fructose-bisphosphate aldolase A isoform 1 precursor ...	NP 一001170778.1 (+10)
histidine ammonia-lyase [Mus musculus]	NP 一034531.1
dathrin heavy chain 1 [Mus musculus]	NP 一001003908.1 (+3)
ADP-sugar pyrophosphatase [Mus musculus]	NP 一058614.1 (+4)
ras-related protein R-Ras2 precursor [Mus musculus]	NP 一080122.2
cysteine and glycine-rich protein 1 [Mus musculus]	NP 一 031817.1
spermidine synthase [Mus musculus]	NP 033298.1
protein LSM12 homolog [Mus musculus]	NP 一766535.1(+1)
coatomer subunit alpha [Mus musculus]	NP 一034068.3
liydroxyacylglutathione hydrolase, mitochondrial isof...	NP 一001153098.1 (+3)
myeloid leukemia factor 2 [Mus musculus]	NP 一663360.1(+1)
ras-related protein Rab-35 [Mus musculus]	NP 一937806.1
glutathione S-transferase omega-1 [Mus musculus]	NP 一034492.1
ubiquitin thioesterase OTUB1 [Mus musculus]	NP 一598911.1
rho GDP-dissociation inhibitor 2 isoform 1 [Mus muscu...	NP_001288230.1 (+4)
14-3-3 protein beta/alpha [Mus musculus]	NP一061223.2 (+1)
proteasome subunit beta type-6 precursor [Mus muse...	NP 一032972.3
voltage-dependent anion-selective channel protein 1 ...	NP_035824.1(+1)
inositol monophosphatase 2 [Mus musculus]	NP 一444491.1
ras-related protein Ra卜B precursor [Mus musculus]	NP_071722.1(+1)
proteasome subunit alpha type-5 [Mus musculus]	NP 一036097.1
pyruvate kinase PKM isoform M2 [Mus musculus]	NP一035229.2 (+5)
ATP synthase subunit gamma, mitochondrial isoform ...	NP 一001106209.1 (+1)
3-hydroxyacy卜CoA dehydrogenase type-2 [Mus muse."	NP_058043.3
myeloid-associated differentiation marker [Mus muse...	NP 001087233.1 (+4)
chloride intracellular channel protein 4 [Mus musculus]	NP 一038913.1
protein SC02 homolog, mitochondrial [Mus musculus]	NP 一001104758.1
erythrocyte band 7 integral membrane protein [Mus ...	NP 038543.1
ras-related protein Rab-10 [Mus musculus]	NP 一057885.1
NADH dehydrogenase [ubiquinone] iron-sulfur protein ...	NP 一080964.1
clustered mitochondria protein homolog [Mus muscu■…	NP 一001074627.1 (+1)
pyrroline-5-carboxylate reductase 3 [Mus musculus]	NP 079688.2
membrane-associated progesterone receptor compo...	NP 一058063.2
magnesium transporter protein 1 [Mus musculus]	NP_001177338.1(+1)
ADP/ATP translocase 2 rMus musculusl	NP 031477.1
calponin-2 [Mus musculus]	NP 一031751.1
probable methyltransferase TARBP1 [Mus musculus]	NP_001153379.1
arainase-1 rMus musculusl	NP 031508.1
proteasome subunit alpha type-6 isoform 1 [Mus mus...	NP 一036098.1 (+1)
gasdermin-A [Mus musculus]	NP 一067322.1 (+3)
transmembrane emp24 domain-containing protein 7 ...	NP 079974.1
phosphomannomutase 2 [Mus musculus]	NP 一058577.1
ras-related protein Rab-6A isoform 1 [Mus musculus]	NP_001157135.1(+1)
catalase TMus musculusl	NP 033934.2
proteasome subunit alpha type-3 isoform a [Mus mus."	NP一035314.3 (+1)
elongation factor 1-delta isoform b [Mus musculus]	NP 一001272358.1 (+15)
Drotein fliahtless-1 homoloa isoform 2 rMus musculusl	NP 001289136.1 (+1)
TIP41-like protein [Mus musculus]	NP 一663488.1 (+3)
proteasome subunit alpha type-7 isoform 2 [Mus mus."	NP 一001276405.1 (+1)
cytochrome c oxidase assembly protein COX15 homol...	NP 659123.2
proteasome inhibitor PI31 subunit isoform 2 [Mus mu."	NP_001292173.1(+2)
neuroblast differentiation-associated protein AHNAK i...	NP 一033773.1 (+3)
plectin isoform la [Mus musculus]	NP一958796.2 (+14)
prohibitin [Mus musculus]	NP 一032857.1
14-3-3 protein theta [Mus musculus]	NP 一035869.1
calpain small subunit 1 [Mus musculus]	NP一033925.2 (+1)
very-long-chain enoyl-CoA reductase isoform 2 [Mus ...	NP_081455.1(+1)
Fructose-2,6-bisphosphatase TIGAR [Mus musculus]	NP 一795977.1
V-type proton ATPase subunit E 1 [Mus musculus]	NP 一031536.2
rho GDP-dissociation inhibitor 1 [Mus musculus]	NP一598557.3 (+1)
BTB/POZ domain-containing adapter for CUL3-mediat...	NP 一001153413.1 (+1)
ras-related GTP-binding protein B [Mus musculus]	NP 001004154.1 (+4)
S-methyl-5'-thioadenosine phosphorylase [Mus muse...	NP 一077753.1
heterogeneous nuclear ribonudeoprotein AO [Mus mu...	NP 一084148.1
pleckstrin homology-like domain family B member 2 is...	NP 001239371.1 (+13)
protein N-terminal asparagine amidohydrolase isofor...	NP_001333036.1(+2)
elongation factor 1-alpha 2 [Mus musculus]	NP 031932.1 (+1)
keratin, type I cytoskeletal 13 isoform 1 [Mus muscul".	NP 一034792.1
voltage-dependent anion-selective channel protein 2 ...	NP 一035825.1
solute carrier family 25 member 48 [Mus musculus]	NP 808477.2 (+3)
ribosome maturation protein SBDS [Mus musculus]	NP 一075737.1
electron transfer flavoprotein subunit alpha, mitochon...	NP 一663590.3
protein-L-isoaspartate(D-aspartate) O-methyltransfe...	NP 001334157.1 (+1)
retinoic acid-induced protein 3 [Mus musculus]	NP_852109.2(+1)
40S ribosomal protein S8 [Mus musculus]	NP 一033124.1
tight junction protein ZO-2 isoform 1 [Mus musculus]	NP 一001185914.1 (+5)
protein PBDC1 isoform 2 [Mus musculus]	NP 一001268800.1 (+7)
ras-related protein Rab-llB [Mus musculus]	NP 一033023.1(+1)
protein MEMOl [Mus musculus]	NP_598532.1(+1)
protein S100-A14 isoform a [Mus musculus]	NP 001156997.1 (+1)
elongator complex protein 6 [Mus musculus]	NP 一001074850.1 (+1)
ribonudease P protein subunit p30 [Mus musculus]	NP 一062301.3
dehydrogenase/reductase SDR family member 7B isof...	NP 001165583.1 (+2)
40S ribosomal protein S3a [Mus musculus]	NP 一058655.3
heterogeneous nuclear ribonudeoprotein A3 isoform ...	NP 一444493.1 (+3)
coatomer subunit epsilon [Mus musculus]	NP 067513.1
CTD nuclear envelope phosphatase 1 [Mus musculus]	NP 一080293.1
N-acetyltransferase 9 [Mus musculus]	NP 一079676.1 (+2)
transmembrane emp24 domain-containing protein 9 ...	NP 080487.2
isochorismatase domain-containing protein 1 [Mus m...	NP 一079754.2
myosin-13 [Mus musculus]	NP 一001074719.1 (+12)
Drotein N-terminal asDaraaine amidohvdrolase isofor".	NP 001333035.1 (+1)
annexin A4 [Mus musculus]	NP 一001318049.1 (+3)
proteasome subunit beta type-4 precursor [Mus muse...	NP 一032971.2
40S ribosomal protein S7 [Mus musculus]	NP 035430.1
heat shock cognate 71 kDa protein [Mus musculus]	NP一112442.2 (+6)
plasma membrane calcium-transporting ATPase 1 [M...	NP 一080758.1 (+5)
rho-related GTP-binding protein RhoE precursor [Mus ...	NP 083086.1
L-lactate dehydrogenase A chain isoform 2 [Mus muse."	NP一001129541.2 (+1)
rab-like protein 3 [Mus musculus]	NP 一001035964.1
tripartite motif-containing protein 29 [Mus musculus]	NP一076144.2 (+2)
ras-related protein Rab-34 [Mus musculus]	NP_001152954.1(+1)
6-phosphogluconolactonase isoform 1 [Mus musculus]	NP 一079672.1
enolase IB, retrotransposed [Mus musculus]	NP 001020559.1 (+3)
trypsinogen 12 precursor [Mus musculus]	NP 一001034086.1
phosphoserine phosphatase [Mus musculus]	NP 一598661.1 (+3)
enoyl-CoA hydratase, mitochondrial precursor [Mus m…	NP 一444349.1
PREDICTED: prelamin-A/C isoform XI [Mus musculus]	XP 一006501136.1 (+2)
bifunctional glutamate/proline—tRNA ligase [Mus mus...	NP 一084011.1 (+4)
heat shock-related 70 kDa protein 2 [Mus musculus]	NP 一001002012.1 (+6)
PREDICTED: tetratricopeptide repeat protein 37 isofor...	XP 一017170978.1 (+6)
PREDICTED: ankyrin repeat domain-containing protein...	XP 一006535645.1 (+1)
caspase-14 [Mus musculus]	NP 一033939.1
monoacylglycerol lipase ABHD6 isoform 1 [Mus muscu...	NP_001317993.1(+3)
ras-related protein Rab-3D [Mus musculus]	NP 一001311460.1 (+3)
proliferating cell nuclear antigen [Mus musculus]	NP 035175.1
dynactin subunit 1 isoform 2 [Mus musculus]	NP_001185795.1 (+17)
isopentenyl-diphosphate Delta-isomerase 1 TMus mus...	NP 663335.2 (+1)
cornifin-A [Mus musculus]	NP 一033290.1
sarcoplasmic/endoplasmic reticulum calcium ATPase ...	NP 一001103610.1 (+1)
cytochrome c oxidase subunit II (mitochondrion) [Mu...	NP 一904331.1 (+4)
microtubule-associated protein RP/EB family member...	NP 031922.1
serine/threonine-protein phosphatase PGAM5, mitoch...	NP 一001157010.1 (+1)
keratin, type I cytoskeletal 19 isoform 1 [Mus muscul...	NP 一032497.1
sepiapterin reductase [Mus musculus]	NP 一035597.2
keratin, type II cytoskeletal 7 [Mus musculus]	NP 一149064.1
ATP-dependent RNA helicase Dhx29 [Mus musculus]	NP 766182.2
proteasome subunit alpha type-7-like [Mus musculus]	NP 一001157081.1 (+1)
chloride intracellular channel protein 3 [Mus musculus]	NP 一081361.1
actin-related protein 2/3 complex subunit IB [Mus mu...	NP 一075631.2
gamma-enolase isoform 2 [Mus musculus]	NP 一001289571.1 (+3)
type II keratin Kbl4 [Mus musculus]	NP 一001003670.1
vigilin [Mus musculus]	NP 一001288293.1 (+5)
inositol monophosphatase 1 isoform 1 [Mus musculus]	NP 061352.2 (+1)
chloride intracellular channel protein 1 [Mus musculus]	NP 一254279.1
proteasome subunit beta type-5 [Mus musculus]	NP 一035316.1
PREDICTED: annexin A4 isoform X2 [Mus musculus]	XP 011239460.1
alpha-soluble NSF attachment protein [Mus musculus]	NP 一080174.1
PREDICTED: 39S ribosomal protein L45, mitochondrial i...	XP 一017170202.1 (+1)
XP一006495930.2-DECOY	NP一835586.2 14 kDa 2
histone H2B type 2-E [Mus musculus]	NP一835586.2 14 kDa 2
trvDsinoaen Drecursor rSus scrofal	NP 001156363.1
desmoplakin [Mus musculus]	NP一076331.2 (+1)
PREDICTED: keratin, type I cytoskeletal...	XP_011247070.1(+1)
keratin, type II cytoskeletal 5 [Mus mus...	NP 081287.1 (+4)
keratin, type I cytoskeletal 14 isoform 1...	NP 一058654.1
keratin, type II cytoskeletal 1 [Mus mus...	NP一032499.2 (+4)
fatty acid synthase [Mus musculus]	NP 032014.3
keratin, type II cytoskeletal 6A [Mus mu...	NP 一032502.3
keratin, type II cytoskeletal 2 epidermal...	NP一034798.2 (+1)
keratin, type I cytoskeletal 17 [Mus mus...	NP 034793.1
keratin, type I cytoskeletal 19 isoform 1...	NP_032497.1(+4)
keratin, type II cytoskeletal lb [Mus mu...	NP 一001003667.1 (+1)
destrin rMus musculusl	NP 062745.1
serpin B6 isoform a [Mus musculus]	NP 一001157589.1 (+7)
14-3-3 protein sigma [Mus musculus]	NP一061224.2 (+5)
keratin, type I cytoskeletal 42 [Mus mus...	NP 997648.2
actin, cytoplasmic 1 [Mus musculus]	NP 一031419.1 (+6)
RING finger protein 214 isoform 2 [Mus...	NP 一001297768.1 (+7)
keratin, type II cytoskeletal 73 [Mus mu...	NP 997650.1
keratin, type II cytoskeletal 2 oral [Mus ...	NP_001028349.1
CAD protein isoform 1 [Mus musculus]	NP 一076014.1 (+4)
keratin, type I cytoskeletal 16 isoform 1...	NP 一001300887.1 (+1)
serum albumin precursor [Bos taurus]	gi |30794280| (+5)
glutathione S-transferase omega-1 [Mu...	NP 一034492.1
protein arginine N-methyltransferase 1 i...	NP 一001239405.1 (+3)
very-long-chain 3-oxoacyl-CoA reductas...	NP 一062631.1
myosin-9 [Mus musculus]	NP 一071855.2
glyceraldehyde-3-phosphate dehydroge...	NP 一001276655.1 (+7)
junction plakoglobin [Mus musculus]	NP 一034723.1 (+2)
ADP-ribosylation factor 1 [Mus musculus]	NP 一001123880.1 (+3)
MULTISPECIES: lysyl endopeptidase [Pse...	WP 003110541.1
ubiauitin-40S ribosomal orotein S27a or...	NP_077239.1(+8)
keratin, type I cytoskeletal 15 [Mus mus...	NP 一032495.2
keratin Kb40「Mus musculusl	NP 997652.4 (+2)
40S ribosomal protein S3 [Mus musculus]	NP 一036182.1
uncharacterized protein LOC239673 [Mu...	NP 808385.2
cofilin-1 TMus musculusl	NP 031713.1
protease, serine, 1 precursor [Mus muse".	NP 一444473.1 (+5)
plasminogen activator inhibitor 2, macro."	NP 001167641.1 (+2)
acetyl-CoA carboxylase 1 [Mus musculus]	NP_579938.2 (+8)
inositol 1,4,5-trisphosphate receptor typ...	NP一542120.2 (+1)
keratin, type I cytoskeletal 13 isoform 1...	NP 034792.1
transmembrane protein 65 [Mus muscul".	NP 一780421.2
PREDICTED: phosphate carrier protein,...	XP 一006513434.1 (+1)
fructose-bisphosphate aldolase A isofor...	NP_001170778.1 (+10)
actin, alpha skeletal muscle [Mus muscu...	NP 一001258970.1 (+7)
mitochondrial import inner membrane tr...	NP_035722.2
prohibitin [Mus musculus]	NP_032857.1
desmoglein-l-beta preproprotein [Mus ...	NP 859010.1 (+1)
keratin, type II cytoskeletal 79 [Mus mu...	NP 一666175.1
macrophage-capping protein [Mus muse...	NP_001035999.1 (+4)
ADP/ATP translocase 2 [Mus musculus]	NP 一031477.1
keratin, type I cuticular Ha4 [Mus muscu...	NP 一081839.1 (+1)
mitotic checkpoint protein BUB3 [Mus m...	NP 一001304279.1 (+1)
NP 一080264.1-DECOY	NP 一080264.1-DECOY (■
keratin, type II cytoskeletal 75 [Mus mu...	NP 一579935.1
actin-related protein 2/3 complex subun...	NP 080828.1
complement component 1 Q subcompon...	NP 一031599.2
inositol monophosphatase 1 isoform 1 [■"	NP一061352.2 (+1)
poly(rC)-binding protein 1 [Mus musculus]	NP 035995.1
serpin B5 [Mus musculus]	NP 一033283.1
trypsin 10 precursor [Mus musculus]	NP 一001034085.1 (+2)
receptor of activated protein C kinase 1...	NP 一032169.1
nuclear pore complex protein Nup214 [M...	NP一758472.2 (+3)
14-3-3 protein gamma [Mus musculus]	NP 一061359.2
ribosome maturation protein SBDS [Mus...	NP 075737.1
phosphoglycerate kinase 1 [Mus muscul...	NP_032854.2
14-3-3 protein epsilon [Mus musculus]	NP 一033562.3
S-methy卜5'-thioadenosine phosphoryla".	NP_077753.1
annexin A2 [Mus musculus]	NP 031611.1 (+1)
60S ribosomal protein L12 [Mus musculu...	NP 一033102.2
14-3-3 protein zeta/delta isoform 1 [Mu...	NP 001240734.1 (+4)
signal recognition particle receptor subu...	NP 一033301.1
26S proteasome regulatory subunit 10B ...	NP 一080235.2
erlin-2 [Mus musculus]	NP 705820.1 (+4)
retinol dehydrogenase 11 precursor [Mu...	NP_067532.2
chloride intracellular channel protein 1 [...	NP 一254279.1
elongation factor 1-beta [Mus musculus]	NP 061266.2
ADP-ribosylation factor 4 [Mus musculus]	NP_031505.1
type II hair keratin [Mus musculus]	NP 一001188252.1
dystonin isoform 4 [Mus musculus]	NP一034211.2 (+1)
heterogeneous nuclear ribonudeoprotei...	NP 一444493.1 (+3)
tubulin-folding cofactor B [Mus musculus]	NP_079824.2 (+1)
40S ribosomal protein Sll [Mus musculu...	NP 038753.1
TrylO-like trypsinogen precursor [Mus ...	NP 一001003664.1 (+2)
vacuolar protein sorting-associated prot...	NP 一821170.1
elongation factor 1-alpha 1 [Mus muscul...	NP_034236.2
LIM domain onlv Drotein 7 isoform 2「Mu...	NP 001334557.1 f+20) 165 kDa
daudin-4 [Mus musculus]	NP 一034033.1
monocarboxylate transporter 1 [Mus m...	NP_033222.1
GTP-binding protein Rheb precursor [Mu...	NP 一444305.2
eukaryotic translation elongation factor ...	NP一079738.2 (+2)
serine proteinase inhibitor member 6C [...	NP一683744.2 (+2)
40S ribosomal protein S4, X isoform [Mu...	NP 一033120.1 (+1)
plakophilin-1 [Mus musculus]	NP 一001300630.1 (+1)
purine nucleoside phosphorylase [Mus ...	NP 一038660.1
carbonic anhydrase 13 [Mus musculus]	NP 一078771.1
PREDICTED: filamin-B isoform XI [Mus m...	XP_006518113.1(+2)
filamin-A isoform 1 [Mus musculus]	NP 034357.2 (+2)
keratin, type II cytoskeletal 80 [Mus mu...	NP一083046.2 (+1)
magnesium transporter protein 1 [Mus ...	NP_001177338.1 (+1)
cofilin-2 [Mus musculus]	NP 031714.1 (+1)
inositol monophosphatase 2 [Mus muse...	NP 一444491.1
PREDICTED: protein-glutamine gamma-g...	XP 一006518872.1 (+4)
paternally-expressed gene 3 protein [M...	NP一032843.2 (+6)
neurobeachin-like protein 2 [Mus muscu...	NP 一899099.2
retinoic acid-induced protein 3 [Mus mu...	NP一852109.2 (+1)
insulin receptor-related protein precurs…	NP一035962.2 (+3)
serine Tor cvsteine) proteinase inhibitor,...	NP 035582.1
myeloid leukemia factor 2 [Mus musculu...	NP 一001163812.1 (+1)
eukaryotic translation initiation factor 3 ...	NP 一542366.1
keratin, type II cytoskeletal 6B [Mus mu...	NP 034799.2 (+4)
keratin, type II cytoskeletal 7 [Mus mus...	NP 一149064.1
S-formylglutathione hydrolase isoform 1...	NP 一001272352.1 (+2)
neuroblast differentiation-associated pr...	NP 033773.1 (+3)
WD repeat-containing protein 81 [Mus ...	NP一620400.2 (+4)
kinesin-like protein KIF13B [Mus muscul...	NP 一001074646.1 (+4)
transformer-2 protein homolog beta isof".	NP 001317483.1 (+3)
developmentally-regulated GTP-binding...	NP 一067329.1 (+1)
transmembrane emp24 domain-containi...	NP 一081051.1
TIP41-like protein [Mus musculus]	NP 一663488.1 (+3)
heterogeneous nuclear ribonudeoprotei...	NP 一001164452.1 (+21)
alcohol dehydrogenase class-3 isoform ...	NP 一001275507.1 (+1)
mitochondrial import inner membrane tr...	NP 001300622.1 (+2)
actin-related protein 2/3 complex subun...	NP_083987.1(+1)
claudin-3 rMus musculusl	NP 034032.1
40S ribosomal Drotein S18 rMus musculu."	NP 035426.1
talin-1 [Mus musculus]	NP_035732.2(+3)
eIF-2-alpha kinase activator GCN1 [Mus ...	NP 一766307.2
SUMO-activating enzyme subunit 1 isofo...	NP 一001272820.1 (+3)
14-3-3 protein theta [Mus musculus]	NP 一035869.1
heterogeneous nuclear ribonudeoprotei...	NP 一001041526.1 (+1)
argininosuccinate synthase [Mus muscul...	NP 一031520.1
trypsin 5 precursor [Mus musculus]	NP 一001003405.1 (+1)
probable ubiquitin carboxy卜terminal hy."	NP一033507.2 (+9)
cydin-dependent kinase 1 [Mus musculu...	NP 一031685.2
glia maturation factor beta [Mus muscul...	NP 一071306.2
3-ketoacyl-CoA thiolase, mitochondrial [...	NP 一803421.1
solute carrier family 2, facilitated glucos...	NP_035531.3(+3)
vacuolar protein sorting-associated prot…	NP 一001106826.1 (+1)
N-alpha-acetyltransferase 10 isoform 2 ...	NP 一001171436.1 (+1)
chloride intracellular channel protein 4 [...	NP 一038913.1
PREDICTED: myosin-6 isoform XI [Mus m...	XP_006518741.1 (+12)
pyrroline-5-carboxylate reductase 3 [M...	NP 一079688.2
Nudt2 gene product [Mus musculus]	NP 079815.2 (+3)
pre-mRNA-processing-splicing factor 8 [...	NP 一619600.2
ATP synthase subunit gamma, mitochon...	NP 一001106209.1 (+1)
26S proteasome non-ATPase regulatory...	NP 一036005.1
activator of 90 kDa heat shock protein A...	NP 一666148.1
tyrosine-protein phosphatase non-rece...	NP 035334.2
ADP-ribosylation factor 5 [Mus musculus]	NP 一031506.1 (+10)
40S ribosomal protein S10 [Mus musculu...	NP 一080239.1 (+1)
serine/threonine-protein phosphatase P...	NP_001157010.1 (+1)
protein SGT1 homolog [Mus musculus]	NP 一080750.1
very-long-chain enoyl-CoA reductase is...	NP 一081455.1 (+1)
PREDICTED: 14-3-3 protein beta/alpha is...	XP 一006499972.1 (+1)
14-3-3 protein eta [Mus musculus]	NP 一035868.1
182 kDa tankyrase-l-binding protein [M...	NP 一001074729.1 (+6)
serine-threonine kinase receptor-associ...	NP 一035629.2
uncharacterized protein LOC75471 [Mus ...	NP 一001074564.1 (+3)
vimentin [Mus musculus]	NP_035831.2
suprabasin isoform 1 precursor [Mus mu…	NP一757342.2 (+1)
NADH-cytochrome b5 reductase 3 [Mus ...	NP_084063.1 (+2)
XP_017175409.1-DECOY	ff_017175409.1-DEC.._

## Sheet: Sheet2
trvDsinoaen Drecursor rSus scrofal			NP 001156363.1
desmoplakin [Mus musculus]			NP一076331.2 (+1)
PREDICTED: keratin, type I cytoskeletal...			XP_011247070.1(+1)
keratin, type II cytoskeletal 5 [Mus mus...			NP 081287.1 (+4)
keratin, type I cytoskeletal 14 isoform 1...			NP 一058654.1
keratin, type II cytoskeletal 1 [Mus mus...			NP一032499.2 (+4)
fatty acid synthase [Mus musculus]			NP 032014.3
keratin, type II cytoskeletal 6A [Mus mu...			NP 一032502.3
keratin, type II cytoskeletal 2 epidermal...			NP一034798.2 (+1)
keratin, type I cytoskeletal 17 [Mus mus...			NP 034793.1
keratin, type I cytoskeletal 19 isoform 1...			NP_032497.1(+4)
keratin, type II cytoskeletal lb [Mus mu...			NP 一001003667.1 (+1)
destrin rMus musculusl			NP 062745.1
serpin B6 isoform a [Mus musculus]			NP 一001157589.1 (+7)
14-3-3 protein sigma [Mus musculus]			NP一061224.2 (+5)
keratin, type I cytoskeletal 42 [Mus mus...			NP 997648.2
actin, cytoplasmic 1 [Mus musculus]			NP 一031419.1 (+6)
RING finger protein 214 isoform 2 [Mus...			NP 一001297768.1 (+7)
keratin, type II cytoskeletal 73 [Mus mu...			NP 997650.1
keratin, type II cytoskeletal 2 oral [Mus ...			NP_001028349.1
CAD protein isoform 1 [Mus musculus]			NP 一076014.1 (+4)
keratin, type I cytoskeletal 16 isoform 1...			NP 一001300887.1 (+1)
serum albumin precursor [Bos taurus]			gi |30794280| (+5)
glutathione S-transferase omega-1 [Mu...			NP 一034492.1
protein arginine N-methyltransferase 1 i...			NP 一001239405.1 (+3)
very-long-chain 3-oxoacyl-CoA reductas...			NP 一062631.1
myosin-9 [Mus musculus]			NP 一071855.2
glyceraldehyde-3-phosphate dehydroge...			NP 一001276655.1 (+7)
junction plakoglobin [Mus musculus]			NP 一034723.1 (+2)
ADP-ribosylation factor 1 [Mus musculus]			NP 一001123880.1 (+3)
MULTISPECIES: lysyl endopeptidase [Pse...			WP 003110541.1
ubiauitin-40S ribosomal orotein S27a or...			NP_077239.1(+8)
keratin, type I cytoskeletal 15 [Mus mus...			NP 一032495.2
keratin Kb40「Mus musculusl			NP 997652.4 (+2)
40S ribosomal protein S3 [Mus musculus]			NP 一036182.1
uncharacterized protein LOC239673 [Mu...			NP 808385.2
cofilin-1 TMus musculusl			NP 031713.1
protease, serine, 1 precursor [Mus muse".			NP 一444473.1 (+5)
plasminogen activator inhibitor 2, macro."			NP 001167641.1 (+2)
acetyl-CoA carboxylase 1 [Mus musculus]			NP_579938.2 (+8)
inositol 1,4,5-trisphosphate receptor typ...			NP一542120.2 (+1)
keratin, type I cytoskeletal 13 isoform 1...			NP 034792.1
transmembrane protein 65 [Mus muscul".			NP 一780421.2
PREDICTED: phosphate carrier protein,...			XP 一006513434.1 (+1)
fructose-bisphosphate aldolase A isofor...			NP_001170778.1 (+10)
actin, alpha skeletal muscle [Mus muscu...			NP 一001258970.1 (+7)
mitochondrial import inner membrane tr...			NP_035722.2
prohibitin [Mus musculus]			NP_032857.1
desmoglein-l-beta preproprotein [Mus ...			NP 859010.1 (+1)
keratin, type II cytoskeletal 79 [Mus mu...			NP 一666175.1
macrophage-capping protein [Mus muse...			NP_001035999.1 (+4)
ADP/ATP translocase 2 [Mus musculus]			NP 一031477.1
keratin, type I cuticular Ha4 [Mus muscu...			NP 一081839.1 (+1)
mitotic checkpoint protein BUB3 [Mus m...			NP 一001304279.1 (+1)
NP 一080264.1-DECOY			NP 一080264.1-DECOY (■
keratin, type II cytoskeletal 75 [Mus mu...			NP 一579935.1
actin-related protein 2/3 complex subun...			NP 080828.1
complement component 1 Q subcompon...			NP 一031599.2
inositol monophosphatase 1 isoform 1 [■"			NP一061352.2 (+1)
poly(rC)-binding protein 1 [Mus musculus]NP 035995.1
serpin B5 [Mus musculus]			NP 一033283.1
trypsin 10 precursor [Mus musculus]			NP 一001034085.1 (+2)
receptor of activated protein C kinase 1...			NP 一032169.1
nuclear pore complex protein Nup214 [M...			NP一758472.2 (+3)
14-3-3 protein gamma [Mus musculus]			NP 一061359.2
ribosome maturation protein SBDS [Mus...			NP 075737.1
phosphoglycerate kinase 1 [Mus muscul...			NP_032854.2
14-3-3 protein epsilon [Mus musculus]			NP 一033562.3
S-methy卜5'-thioadenosine phosphoryla".			NP_077753.1
annexin A2 [Mus musculus]			NP 031611.1 (+1)
60S ribosomal protein L12 [Mus musculu...			NP 一033102.2
14-3-3 protein zeta/delta isoform 1 [Mu...			NP 001240734.1 (+4)
signal recognition particle receptor subu...			NP 一033301.1
26S proteasome regulatory subunit 10B ...			NP 一080235.2
erlin-2 [Mus musculus]			NP 705820.1 (+4)
retinol dehydrogenase 11 precursor [Mu...			NP_067532.2
chloride intracellular channel protein 1 [...			NP 一254279.1
elongation factor 1-beta [Mus musculus]			NP 061266.2
ADP-ribosylation factor 4 [Mus musculus] NP_031505.1
type II hair keratin [Mus musculus]			NP 一001188252.1
dystonin isoform 4 [Mus musculus]			NP一034211.2 (+1)
heterogeneous nuclear ribonudeoprotei...			NP 一444493.1 (+3)
tubulin-folding cofactor B [Mus musculus] NP_079824.2 (+1)
40S ribosomal protein Sll [Mus musculu...			NP 038753.1
TrylO-like trypsinogen precursor [Mus ...			NP 一001003664.1 (+2)
vacuolar protein sorting-associated prot...			NP 一821170.1
elongation factor 1-alpha 1 [Mus muscul... NP_034236.2
LIM domain onlv Drotein 7 isoform 2「Mu...			NP 001334557.1 f+20) 165 kDa
daudin-4 [Mus musculus]			NP 一034033.1
monocarboxylate transporter 1 [Mus m...			NP_033222.1
GTP-binding protein Rheb precursor [Mu...			NP 一444305.2
eukaryotic translation elongation factor ...			NP一079738.2 (+2)
serine proteinase inhibitor member 6C [...			NP一683744.2 (+2)
40S ribosomal protein S4, X isoform [Mu...			NP 一033120.1 (+1)
plakophilin-1 [Mus musculus]			NP 一001300630.1 (+1)
purine nucleoside phosphorylase [Mus ...			NP 一038660.1
carbonic anhydrase 13 [Mus musculus]			NP 一078771.1
PREDICTED: filamin-B isoform XI [Mus m...			XP_006518113.1(+2)
filamin-A isoform 1 [Mus musculus]			NP 034357.2 (+2)
keratin, type II cytoskeletal 80 [Mus mu...			NP一083046.2 (+1)
magnesium transporter protein 1 [Mus ...			NP_001177338.1 (+1)
cofilin-2 [Mus musculus]			NP 031714.1 (+1)
inositol monophosphatase 2 [Mus muse...			NP 一444491.1
PREDICTED: protein-glutamine gamma-g...			XP 一006518872.1 (+4)
paternally-expressed gene 3 protein [M...			NP一032843.2 (+6)
neurobeachin-like protein 2 [Mus muscu...			NP 一899099.2
retinoic acid-induced protein 3 [Mus mu...			NP一852109.2 (+1)
insulin receptor-related protein precurs…			NP一035962.2 (+3)
serine Tor cvsteine) proteinase inhibitor,...			NP 035582.1
myeloid leukemia factor 2 [Mus musculu...			NP 一001163812.1 (+1)
eukaryotic translation initiation factor 3 ...			NP 一542366.1
keratin, type II cytoskeletal 6B [Mus mu...			NP 034799.2 (+4)
keratin, type II cytoskeletal 7 [Mus mus...			NP 一149064.1
S-formylglutathione hydrolase isoform 1...			NP 一001272352.1 (+2)
neuroblast differentiation-associated pr...			NP 033773.1 (+3)
WD repeat-containing protein 81 [Mus ...			NP一620400.2 (+4)
kinesin-like protein KIF13B [Mus muscul...			NP 一001074646.1 (+4)
transformer-2 protein homolog beta isof".			NP 001317483.1 (+3)
developmentally-regulated GTP-binding...			NP 一067329.1 (+1)
transmembrane emp24 domain-containi...			NP 一081051.1
TIP41-like protein [Mus musculus]			NP 一663488.1 (+3)
heterogeneous nuclear ribonudeoprotei...			NP 一001164452.1 (+21)
alcohol dehydrogenase class-3 isoform ...			NP 一001275507.1 (+1)
mitochondrial import inner membrane tr...			NP 001300622.1 (+2)
actin-related protein 2/3 complex subun...			NP_083987.1(+1)
claudin-3 rMus musculusl			NP 034032.1
40S ribosomal Drotein S18 rMus musculu."			NP 035426.1
talin-1 [Mus musculus]			NP_035732.2(+3)
eIF-2-alpha kinase activator GCN1 [Mus ...			NP 一766307.2
SUMO-activating enzyme subunit 1 isofo...			NP 一001272820.1 (+3)
14-3-3 protein theta [Mus musculus]			NP 一035869.1
heterogeneous nuclear ribonudeoprotei...			NP 一001041526.1 (+1)
argininosuccinate synthase [Mus muscul...			NP 一031520.1
trypsin 5 precursor [Mus musculus]			NP 一001003405.1 (+1)
probable ubiquitin carboxy卜terminal hy."			NP一033507.2 (+9)
cydin-dependent kinase 1 [Mus musculu...			NP 一031685.2
glia maturation factor beta [Mus muscul...			NP 一071306.2
3-ketoacyl-CoA thiolase, mitochondrial [...			NP 一803421.1
solute carrier family 2, facilitated glucos...			NP_035531.3(+3)
vacuolar protein sorting-associated prot…			NP 一001106826.1 (+1)
N-alpha-acetyltransferase 10 isoform 2 ...			NP 一001171436.1 (+1)
chloride intracellular channel protein 4 [...			NP 一038913.1
PREDICTED: myosin-6 isoform XI [Mus m...			XP_006518741.1 (+12)
pyrroline-5-carboxylate reductase 3 [M...			NP 一079688.2
Nudt2 gene product [Mus musculus]			NP 079815.2 (+3)
pre-mRNA-processing-splicing factor 8 [...			NP 一619600.2
ATP synthase subunit gamma, mitochon...			NP 一001106209.1 (+1)
26S proteasome non-ATPase regulatory...			NP 一036005.1
activator of 90 kDa heat shock protein A...			NP 一666148.1
tyrosine-protein phosphatase non-rece...			NP 035334.2
ADP-ribosylation factor 5 [Mus musculus]			NP 一031506.1 (+10)
40S ribosomal protein S10 [Mus musculu...			NP 一080239.1 (+1)
serine/threonine-protein phosphatase P...			NP_001157010.1 (+1)
protein SGT1 homolog [Mus musculus]			NP 一080750.1
very-long-chain enoyl-CoA reductase is...			NP 一081455.1 (+1)
PREDICTED: 14-3-3 protein beta/alpha is...			XP 一006499972.1 (+1)
14-3-3 protein eta [Mus musculus]			NP 一035868.1
182 kDa tankyrase-l-binding protein [M...			NP 一001074729.1 (+6)
serine-threonine kinase receptor-associ...			NP 一035629.2
uncharacterized protein LOC75471 [Mus ...			NP 一001074564.1 (+3)
vimentin [Mus musculus]			NP_035831.2
suprabasin isoform 1 precursor [Mus mu…			NP一757342.2 (+1)
NADH-cytochrome b5 reductase 3 [Mus ... NP_084063.1 (+2) 34 kDa
XP_017175409.1-DECOY			ff_017175409.1-DEC.._
