# Supplementary material for: Keratin 14-dependent disulfides regulate epidermal homeostasis and barrier function via 14-3-3σ and YAP1
Source: eLife. 2020 May 5;9:e53165. doi: 10.7554/eLife.53165 (PMC7250575; doi:10.7554/eLife.53165)
Supplement: Supplementary file 3. [file elife-53165-supp3.xlsx]

## Sheet: Sheet1
		Supplementary Table 3 - List of oligonucleotide primers (Guo et al.)
		Primers for analysis of gene expression at the mRNA transcript level				Primers for genotyping at the genomic DNA level
		Gene	Orientation	Sequence (5’->3’)		Gene	Orientation	Sequence (5’-3’)
		S100a1	forward	AATGTGTTCCATGCCCATTCG		Krt14 WT	forward	AGACCAAAGGCCGTTACTG
			reverse	ACCAGCACAACATACTCCTTG			reverse	TTGAGGTGGAGGAGGAGTCT
		S100a2	forward	GAACAACCTCGATAAGGACAGTG		Krt14C373A	forward	ACCAAAGGCCGTTACGC
			reverse	CCAGATAGCAGAATCCACCAGA			reverse	GAAGCCAAGTCACACCCCTG
		S100a7a	forward	AGGAGTTGAAAGCTCTGCTCT
			reverse	GCTCTGTGATGTAGTATGGCTG
		S100a8	forward	AAATCACCATGCCCTCTACAAG
			reverse	CCCACTTTTATCACCATCGCAA
		S100a9	forward	ATACTCTAGGAAGGAAGGACACC
			reverse	TCCATGATGTCATTTATGAGGGC
		S100a10	forward	TGGAAACCATGATGCTTACGTT
			reverse	GAAGCCCACTTTGCCATCTC
		Il-1a	forward	CGAAGACTACAGTTCTGCCATT
			reverse	GACGTTTCAGAGGTTCTCAGAG
		Il-1b	forward	GAAATGCCACCTTTTGACAGTG
			reverse	CTGGATGCTCTCATCAGGACA
		Hmgb1	forward	GGCGAGCATCCTGGCTTATC
			reverse	GGCTGCTTGTCATCTGCTG
		Defb3	forward	CATCTGCCTCCTTTCCTCAA
			reverse	CTTTGCATTTCTCCTGGTGC
		Tslp	forward	ACGGATGGGGCTAACTTACAA
			reverse	AGTCCTCGATTTGCTCGAACT
		Hspb1	forward	GGTTGCCCGATGAGTGGTC
			reverse	CTGAGCTGTCGGTTGAGCG
		Hspa8	forward	TCTCGGCACCACCTACTCC
			reverse	CTACGCCCGATCAGACGTTT
		Sprr2d	forward	GTGGGCACACAGGTGGAG
			reverse	GCCGAGACTACTTTGGAGAAC
		Sprr3	forward	CAGGAACCACGGTACGATCT
			reverse	TTCCTGGACCATGCTCTACC
		Mmp9	forward	CTGGACAGCCAGACACTAAAG
			reverse	CTCGCGGCAAGTCTTCAGAG
		Ptgs2	forward	TGC ACT ATG GTT ACA AAA GCT GG
			reverse	TCA GGA AGC TCC TTA TTT CCC TT
		Ccn1	forward	CTGCGCTAAACAACTCAACGA
			reverse	GCAGATCCCTTTCAGAGCGG
		Ccn2	forward	GGGCCTCTTCTGCGATTTC
			reverse	ATCCAGGCAAGTGCATTGGTA
		Zeb1	forward	TGGCAAGACAACGTGAAAGA
			reverse	AACTGGGAAAATGCATCTGG
		Snail2	forward	TGATGCCCAGTCTAGGAAAT
			reverse	AGTGAGGGCAAGAGAAAGG
		b-actin	forward	TGGAATCCTGTGGCATCCATGAAAC
			reverse	TAAAACGCAGCTCAGTAACAGTCCG
